# Supplementary figures and images for: AIbZIP/CREB3L4 Promotes Cell Proliferation via the SKP2-p27 Axis in Luminal Androgen Receptor Subtype Triple-Negative Breast Cancer
Source: PubMed Central journal article supplement — Mol Cancer Res. 2024 Jan 18;22(4):373–85. doi: 10.1158/1541-7786.MCR-23-0629 (PMC10985479; doi:10.1158/1541-7786.mcr-23-0629), 2024-01-18

**A**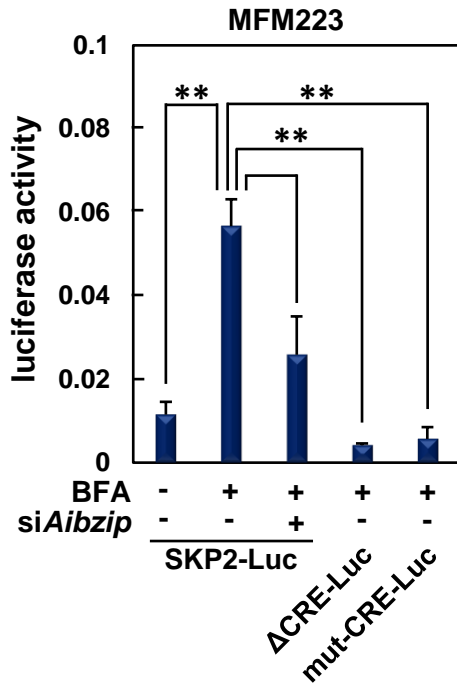**B**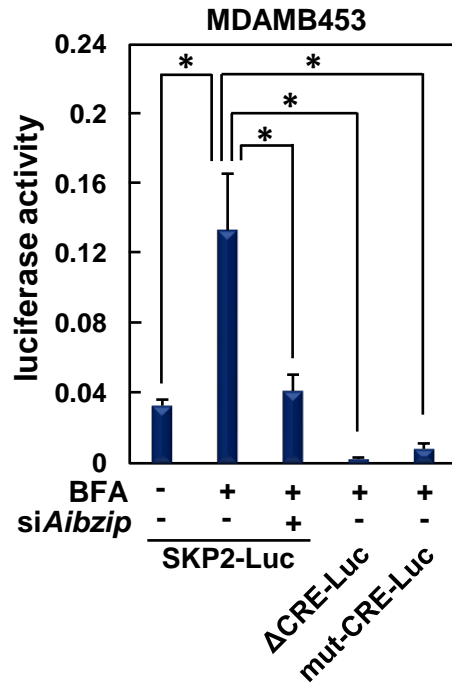**C**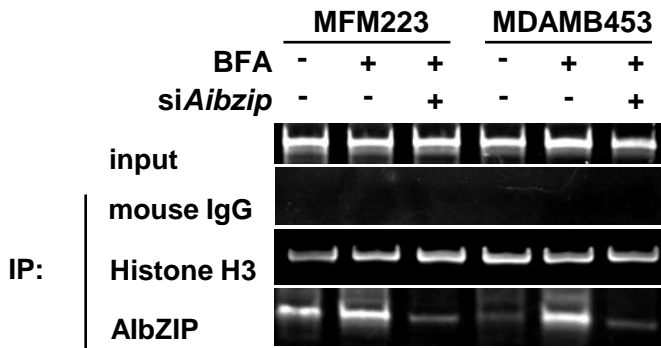

Supplement: mcr-23-0629_supplementary_figure_10_suppsf10.pdf [file mcr-23-0629_supplementary_figure_10_suppsf10.pdf]

**A** **tet-Flag-SKP2-MDAMB453**

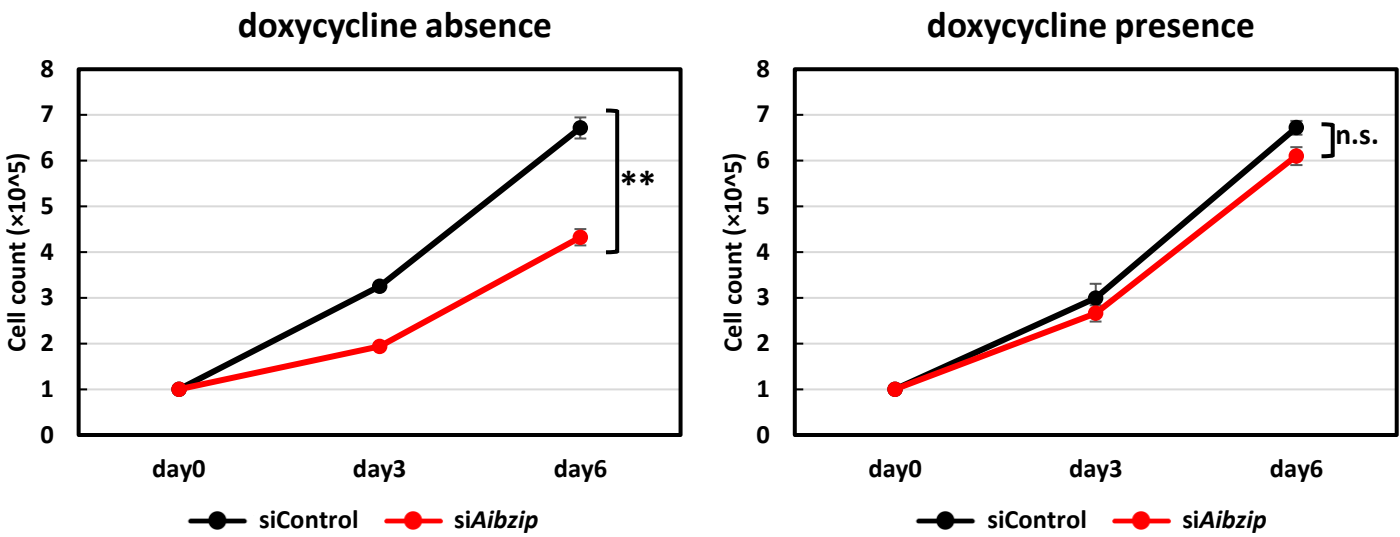

**B** **tet-Flag-SKP2-MDAMB453**

| doxycycline | - | - | + | + |
|-------------|---|---|---|---|
| siAibzip    | - | + | - | + |

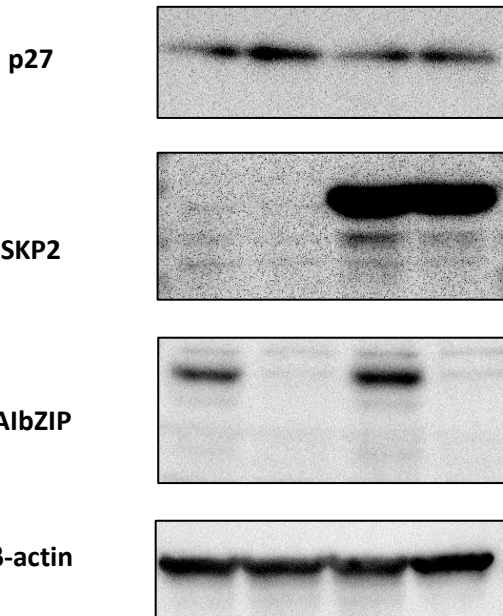

Supplement: mcr-23-0629_supplementary_figure_11_suppsf11.pdf [file mcr-23-0629_supplementary_figure_11_suppsf11.pdf]

A

TNBC subtype *AibZIP* expression (GSE167213)

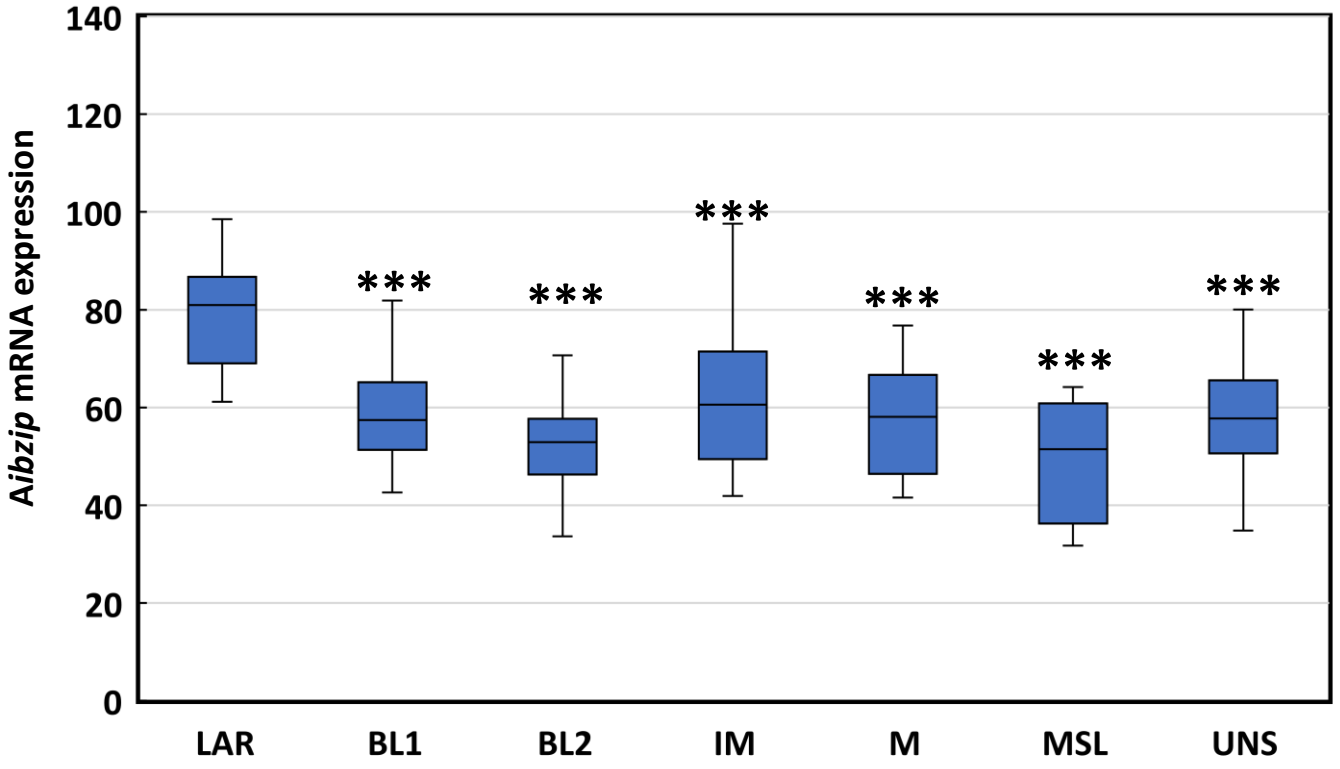

Supplement: mcr-23-0629_supplementary_figure_1_suppsf1.pdf [file mcr-23-0629_supplementary_figure_1_suppsf1.pdf]

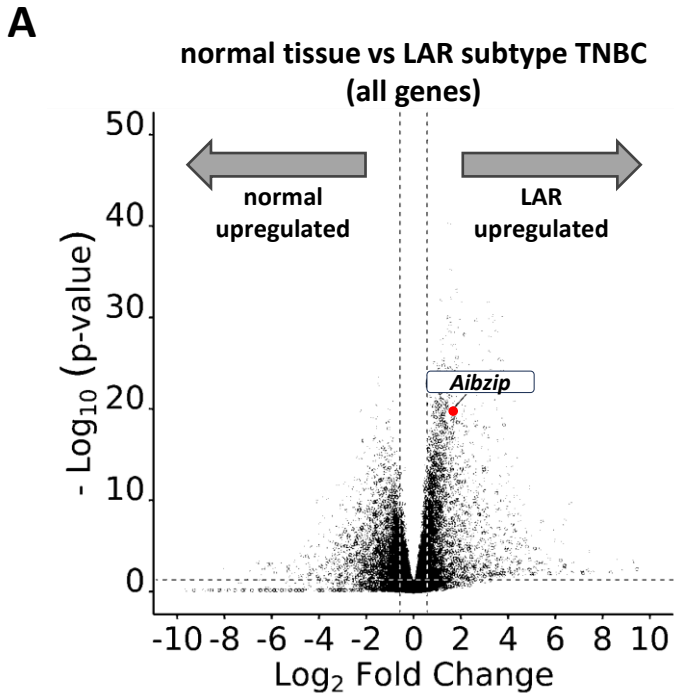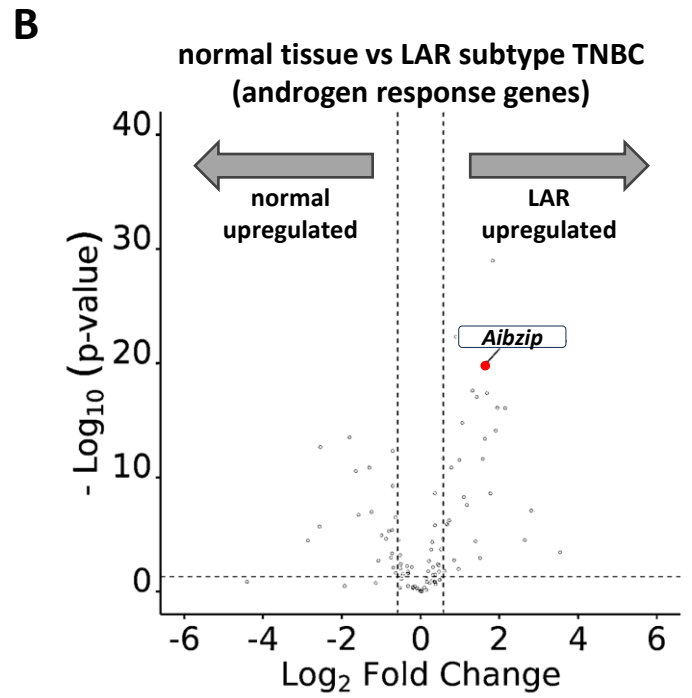

Supplement: mcr-23-0629_supplementary_figure_2_suppsf2.pdf [file mcr-23-0629_supplementary_figure_2_suppsf2.pdf]

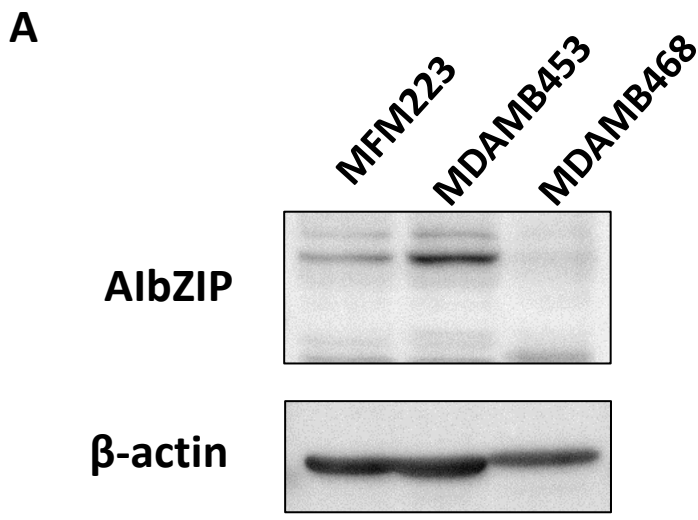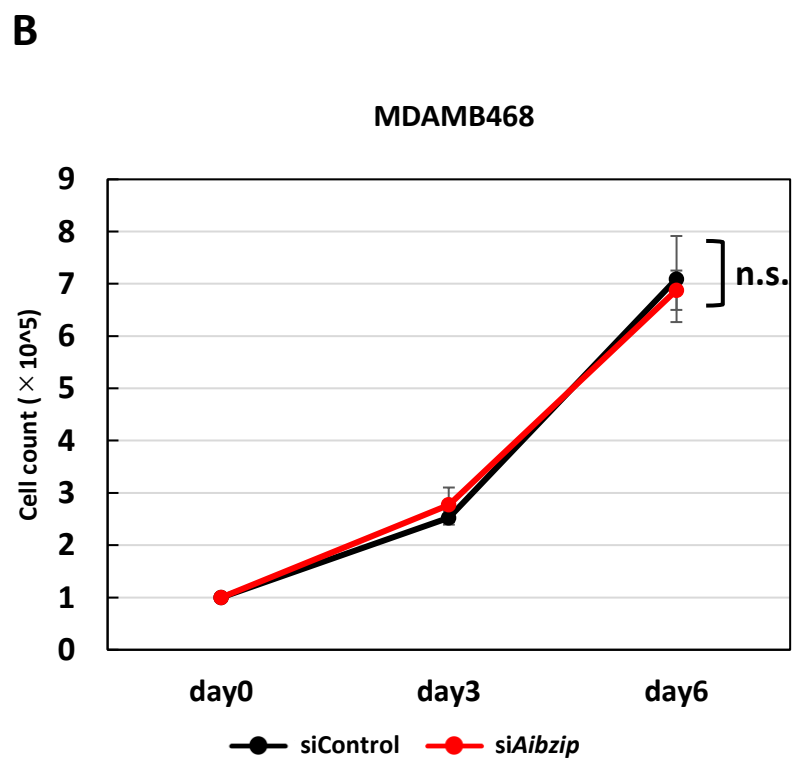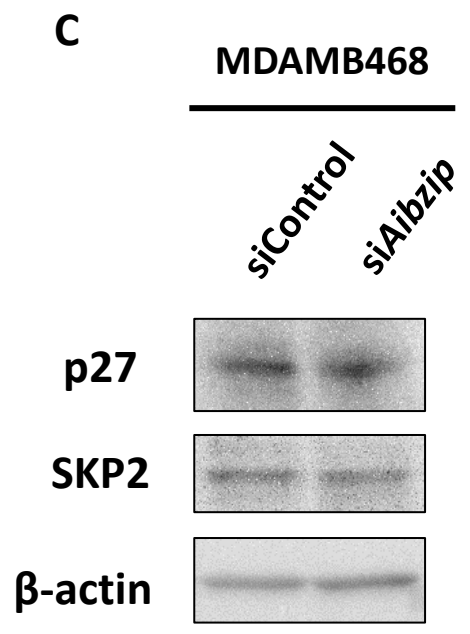

Supplementary Fig. 3

Supplement: mcr-23-0629_supplementary_figure_3_suppsf3.pdf [file mcr-23-0629_supplementary_figure_3_suppsf3.pdf]

**A**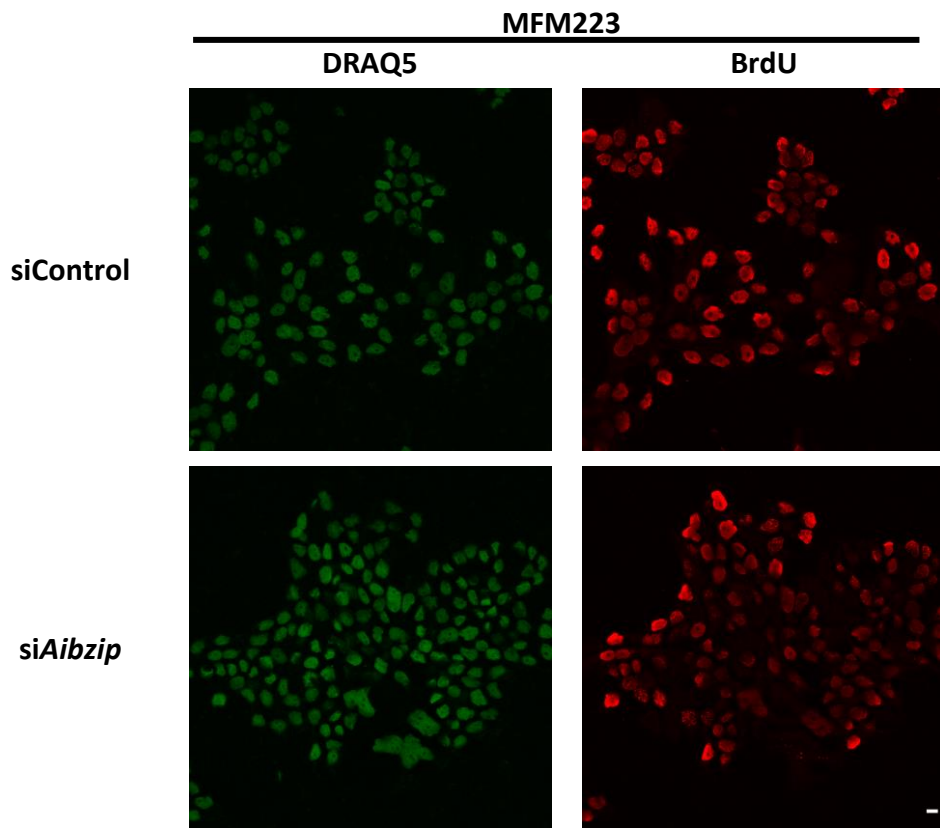**B**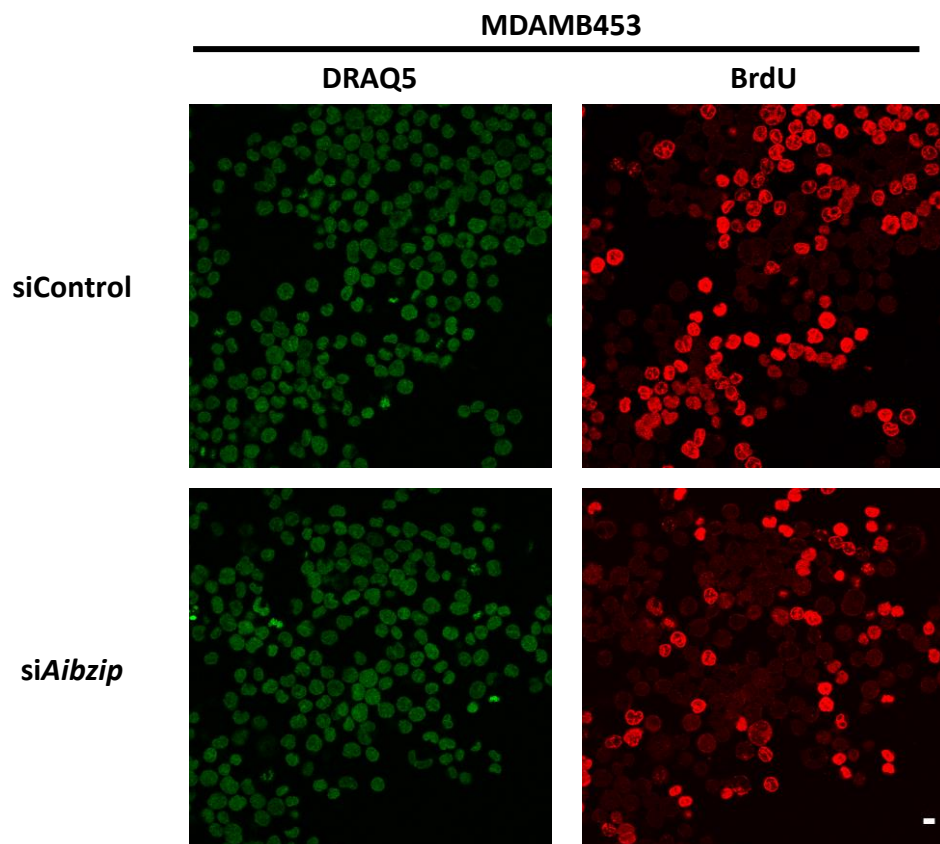

Supplement: mcr-23-0629_supplementary_figure_4_suppsf4.pdf [file mcr-23-0629_supplementary_figure_4_suppsf4.pdf]

**A**

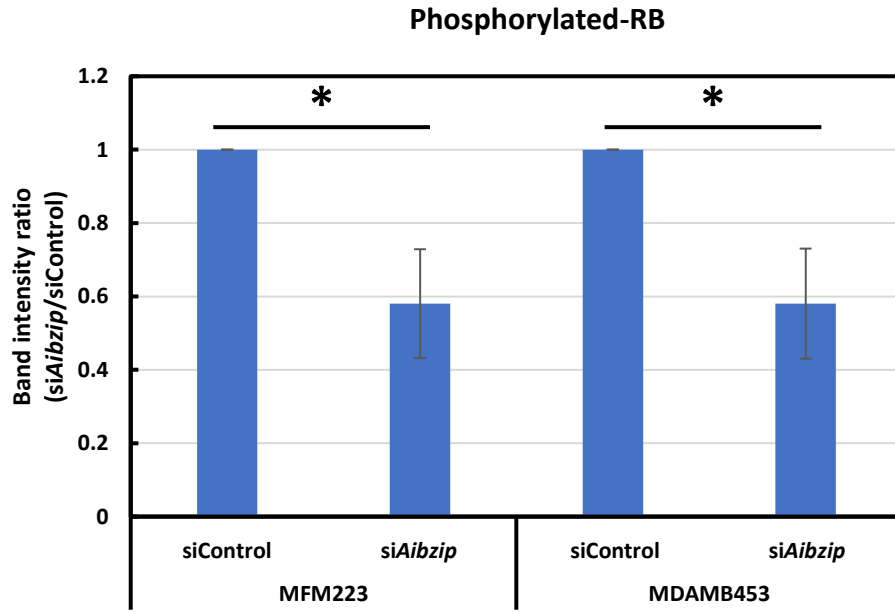

Supplement: mcr-23-0629_supplementary_figure_5_suppsf5.pdf [file mcr-23-0629_supplementary_figure_5_suppsf5.pdf]

**A**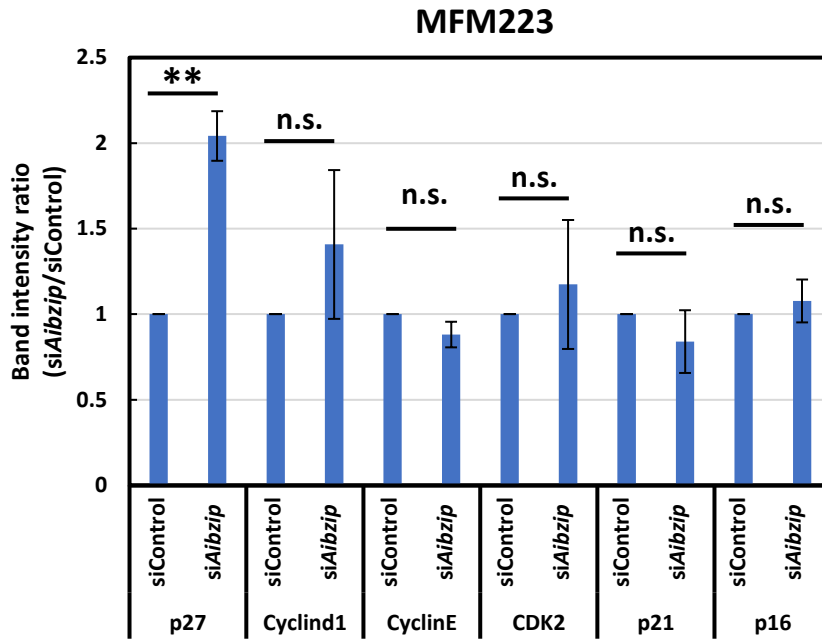**B**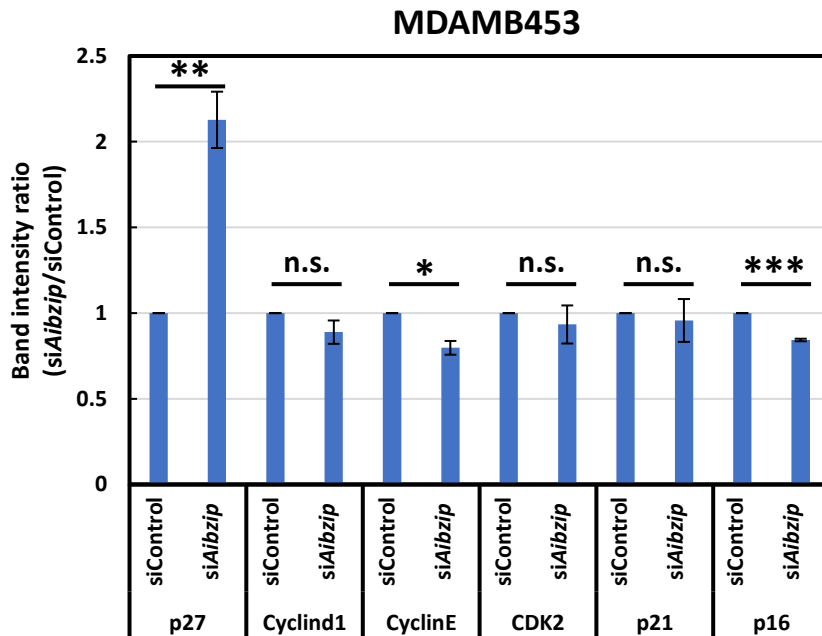

Supplement: mcr-23-0629_supplementary_figure_6_suppsf6.pdf [file mcr-23-0629_supplementary_figure_6_suppsf6.pdf]

**A**

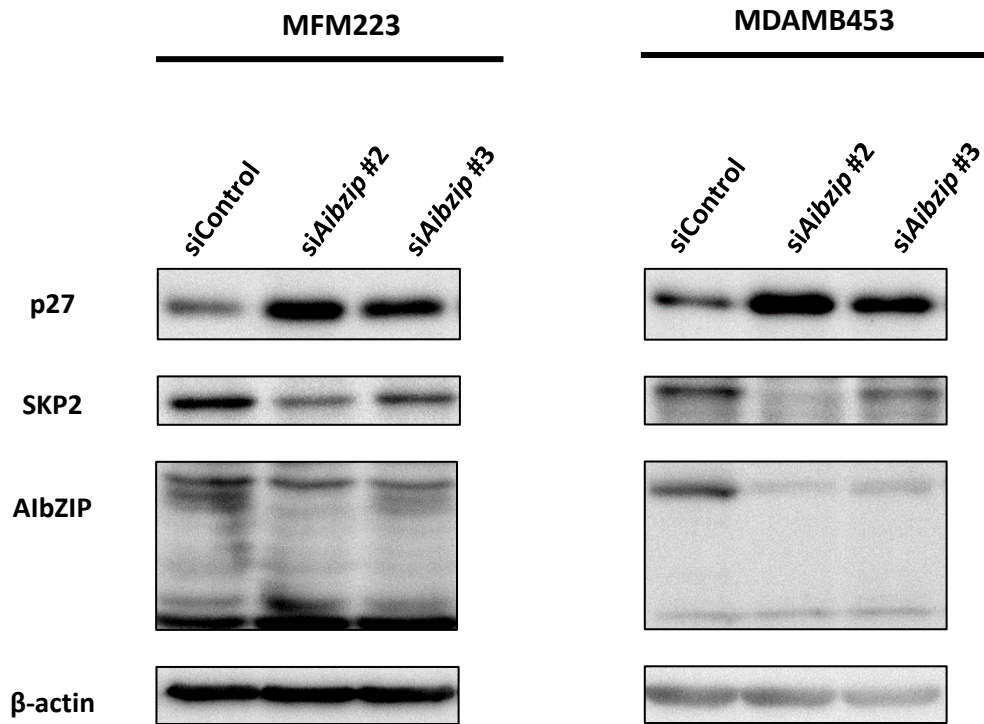

Supplement: mcr-23-0629_supplementary_figure_7_suppsf7.pdf [file mcr-23-0629_supplementary_figure_7_suppsf7.pdf]

**A**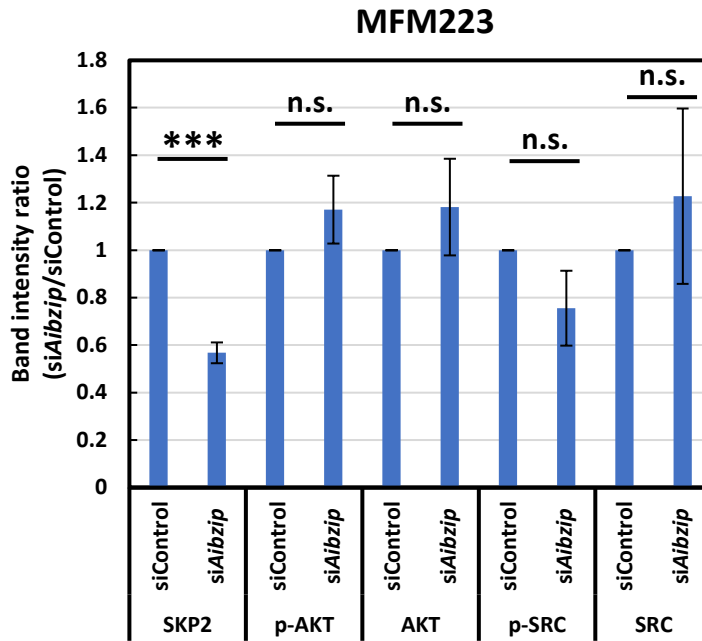**B**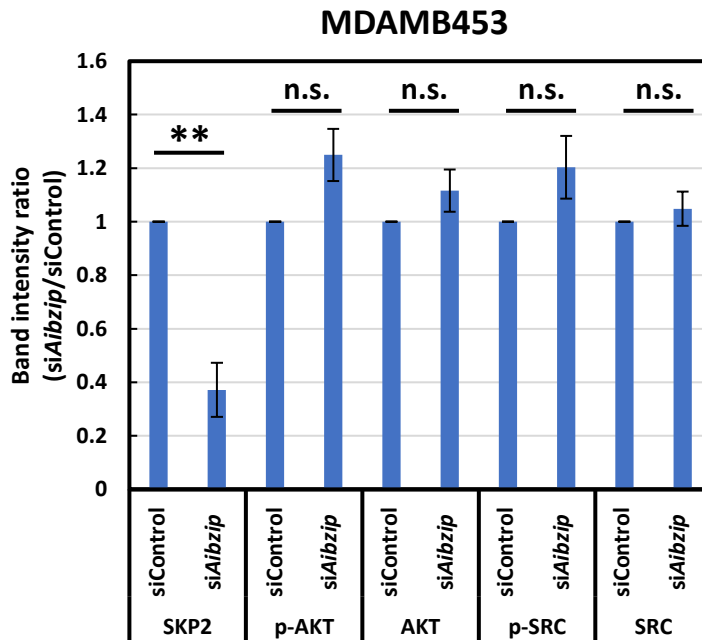

Supplement: mcr-23-0629_supplementary_figure_8_suppsf8.pdf [file mcr-23-0629_supplementary_figure_8_suppsf8.pdf]

**A**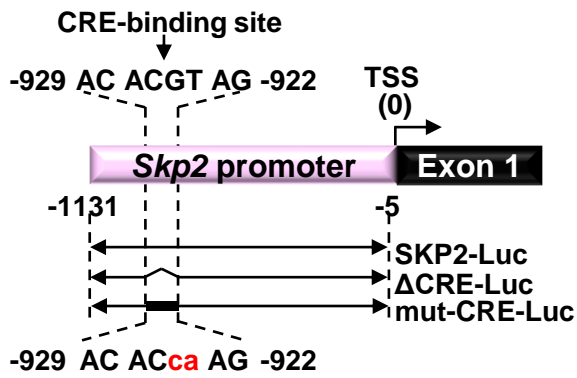**B**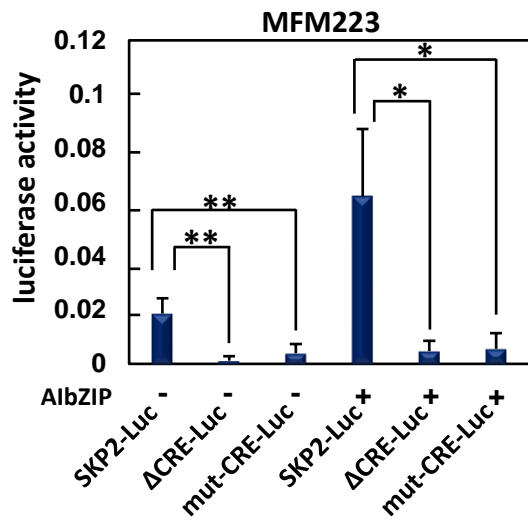**C**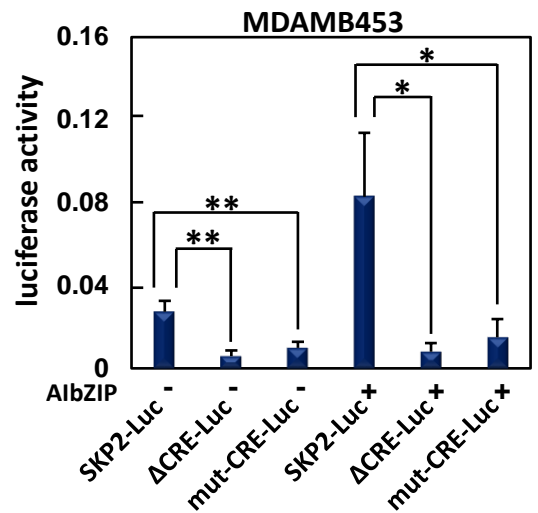

Supplement: mcr-23-0629_supplementary_figure_9_suppsf9.pdf [file mcr-23-0629_supplementary_figure_9_suppsf9.pdf]
